# Supplementary material for: The role of BRCA status on prognosis in patients with triple-negative breast cancer
Source: PubMed Central journal article supplement (PMC5675622; doi:10.18632/oncotarget.19895), 2017-08-03
Supplement: oncotarget-08-87151-s001.pdf [file oncotarget-08-87151-s001.pdf]

## The role of BRCA status on prognosis in patients with triple-negative breast cancer

### SUPPLEMENTARY MATERIALS

Supplementary Table 1: Detailed information about *BRCA1* and *BRCA2* mutations

| Gene         | Exon  | Nucleotide change         | Amino acid change | Category <sup>a</sup> | Variant type                  | Somatic/germline |
|--------------|-------|---------------------------|-------------------|-----------------------|-------------------------------|------------------|
| <i>BRCA1</i> | 2     | c.66dup                   | E23INS            | P                     | Frameshift insertion/deletion | Germline         |
| <i>BRCA1</i> | 8     | c.519del                  | Q174DEL           | P                     | Frameshift insertion/deletion | Germline         |
| <i>BRCA1</i> | 11    | c.981_982del              | C328DEL           | P                     | Frameshift insertion/deletion | Germline         |
| <i>BRCA1</i> | 11    | c.2556_2557insTTCACCTTTTC | L852INS           | P                     | Frameshift insertion/deletion | Germline         |
| <i>BRCA1</i> | 11    | c.2570T>A                 | L857*             | P                     | Nonsense mutation             | Germline         |
| <i>BRCA1</i> | 11    | c.4069_4070insTTGA        | Q1356DEL          | P                     | Frameshift insertion/deletion | Germline         |
| <i>BRCA1</i> | 16    | c.4801A>T                 | K1601*            | P                     | Nonsense mutation             | Germline         |
| <i>BRCA1</i> | 16    | c.4712del                 | F1571DEL          | P                     | Frameshift insertion/deletion | Germline         |
| <i>BRCA1</i> | 24    | c.5470_5477del            | I1824DEL          | P                     | Frameshift insertion/deletion | Germline         |
| <i>BRCA1</i> | 24    | c.5503C>T                 | R1835*            | P                     | Nonsense mutation             | Somatic          |
| <i>BRCA1</i> | 16-17 | c.4676_5074del            | E1559_T1691del    | P                     | Exonic deletion               | Germline         |
| <i>BRCA1</i> | 5     | c.192T>G                  | C64W              | P                     | Missense mutation             | Germline         |
| <i>BRCA2</i> | 10    | c.1399A>T                 | K467*             | P                     | Nonsense mutation             | Germline         |
| <i>BRCA2</i> | 11    | c.6402_6406del            | N2134DEL          | P                     | Frameshift insertion/deletion | Germline         |
| <i>BRCA2</i> | 11    | c.5645C>A                 | S1882*            | P                     | Nonsense mutation             | Germline         |

<sup>a</sup>Variants were annotated using Alamut software (Interactive biosoftware, France) integrated with multiple databases. Germline variants were interpreted according to the American College of Medical Genetics and Genomics (ACMG). Variants that produce premature termination codons which are associated with non-functional or truncated proteins were classified as pathogenic (P) variants: such as nonsense mutations, frameshift mutations, splice site mutations and exonic deletions. Similarly, inactivating somatic variants were considered as pathogenic variants: such as nonsense mutations and frameshift mutations.

Supplementary Table 2: Age distribution of BRCA1 mutation in 70 triple-negative breast cancer patients

| Age of onset | Total TNBC No. of patients | BRCA1 carrier |      |
|--------------|----------------------------|---------------|------|
|              |                            | No.           | %    |
| <40          | 10                         | 1             | 10   |
| <50          | 38                         | 8             | 21.1 |
| <60          | 55                         | 11            | 20.0 |
| <70          | 67                         | 12            | 17.9 |
| ≤80          | 70                         | 12            | 17.1 |
